# Supplementary material
Source: publisher figshare collection journal article supplement (https://tandf.figshare.com/ndownloader/files/15516530)

## Comparison of pharmacokinetics of tilmicosin in healthy pigs and pigs experimentally infected with *Actinobacillus pleuropneumoniae*

J Xiong<sup>\*</sup>, Q Zhu<sup>\*</sup>, S Yang<sup>\*</sup>, Y Zhao<sup>\*</sup>, L Cui<sup>†</sup>, F Zhuang<sup>‡</sup>, Y Qiu<sup>‡</sup> and J Cao<sup>\*§</sup>

<sup>\*</sup>Department of Veterinary Pharmacology, College of Veterinary Medicine, Huazhong Agricultural University, Wuhan 430070, China

<sup>†</sup>Department of Veterinary Pathology, College of Veterinary Medicine, Huazhong Agricultural University, Wuhan 430070, China

<sup>‡</sup>Hubei Key Laboratory of Animal Nutrition and Feed Science, Hubei Collaborative Innovation Centre for Animal Nutrition and Feed Safety, Wuhan Polytechnic University, Wuhan 430023, China

<sup>§</sup>Corresponding author. E-mail: caojiyue@mail.hzau.edu.cn

**Supplementary Table 1: Mean ( $\pm$  SD) biochemical parameters measured in the serum of pigs prior to inoculation with *Actinobacillus pleuropneumoniae* and immediately before treatment with 20 mg/kg bodyweight tilmicosin (n=6).**

| Biochemical parameters | Pre-inoculation  | Pre-treatment    | P-value |
|------------------------|------------------|------------------|---------|
| AST (U/L)              | 54.0 $\pm$ 10.6  | 62.0 $\pm$ 9.64  | 0.328   |
| ALT (U/L)              | 63.4 $\pm$ 9.24  | 57.7 $\pm$ 3.06  | 0.350   |
| ALP (U/L)              | 126.5 $\pm$ 27.9 | 123.3 $\pm$ 22.8 | 0.892   |
| BUN (mmol/L)           | 6.27 $\pm$ 0.36  | 5.79 $\pm$ 0.27  | 0.051   |
| TG (mmol/L)            | 0.35 $\pm$ 0.15  | 0.34 $\pm$ 0.12  | 0.902   |
| TC (mmol/L)            | 1.41 $\pm$ 0.16  | 1.37 $\pm$ 0.08  | 0.625   |
| TP (g/L)               | 66.8 $\pm$ 5.31  | 62.2 $\pm$ 4.96  | 0.211   |
| Crea ( $\mu$ mol/L)    | 116.0 $\pm$ 30.5 | 125.8 $\pm$ 35.3 | 0.653   |
| Albu (g/L)             | 26.9 $\pm$ 3.65  | 26.9 $\pm$ 3.27  | 0.974   |
| Glu (mmol/L)           | 3.34 $\pm$ 1.01  | 3.29 $\pm$ 0.38  | 0.925   |
| Ca (mmol/L)            | 2.31 $\pm$ 0.09  | 2.22 $\pm$ 0.15  | 0.268   |
| P (mmol/L)             | 2.24 $\pm$ 0.22  | 2.41 $\pm$ 0.23  | 0.266   |

Note: AST, aspartate aminotransferase alanine; ALT, alanine aminotransferase; ALP, alkaline phosphatase; BUN, blood urea nitrogen. TG, triglyceride; TC, total cholesterol; TP, total protein; Crea, creatinine; Albu, albumin; Glu, glucose; Ca, calcium; P, phosphorus.

**Supplementary Figure 1. Representative chromatograms of (a) a blank plasma sample, (b) a plasma sample spiked with tilmicosin at the lower limit of quantification (0.05 µg/mL), (c) plasma from an uninfected pig, and (d) an infected pig, 1 hour after administration of tilmicosin. Note tilmicosin peak is detected at the retention time of 9.1 minutes.**

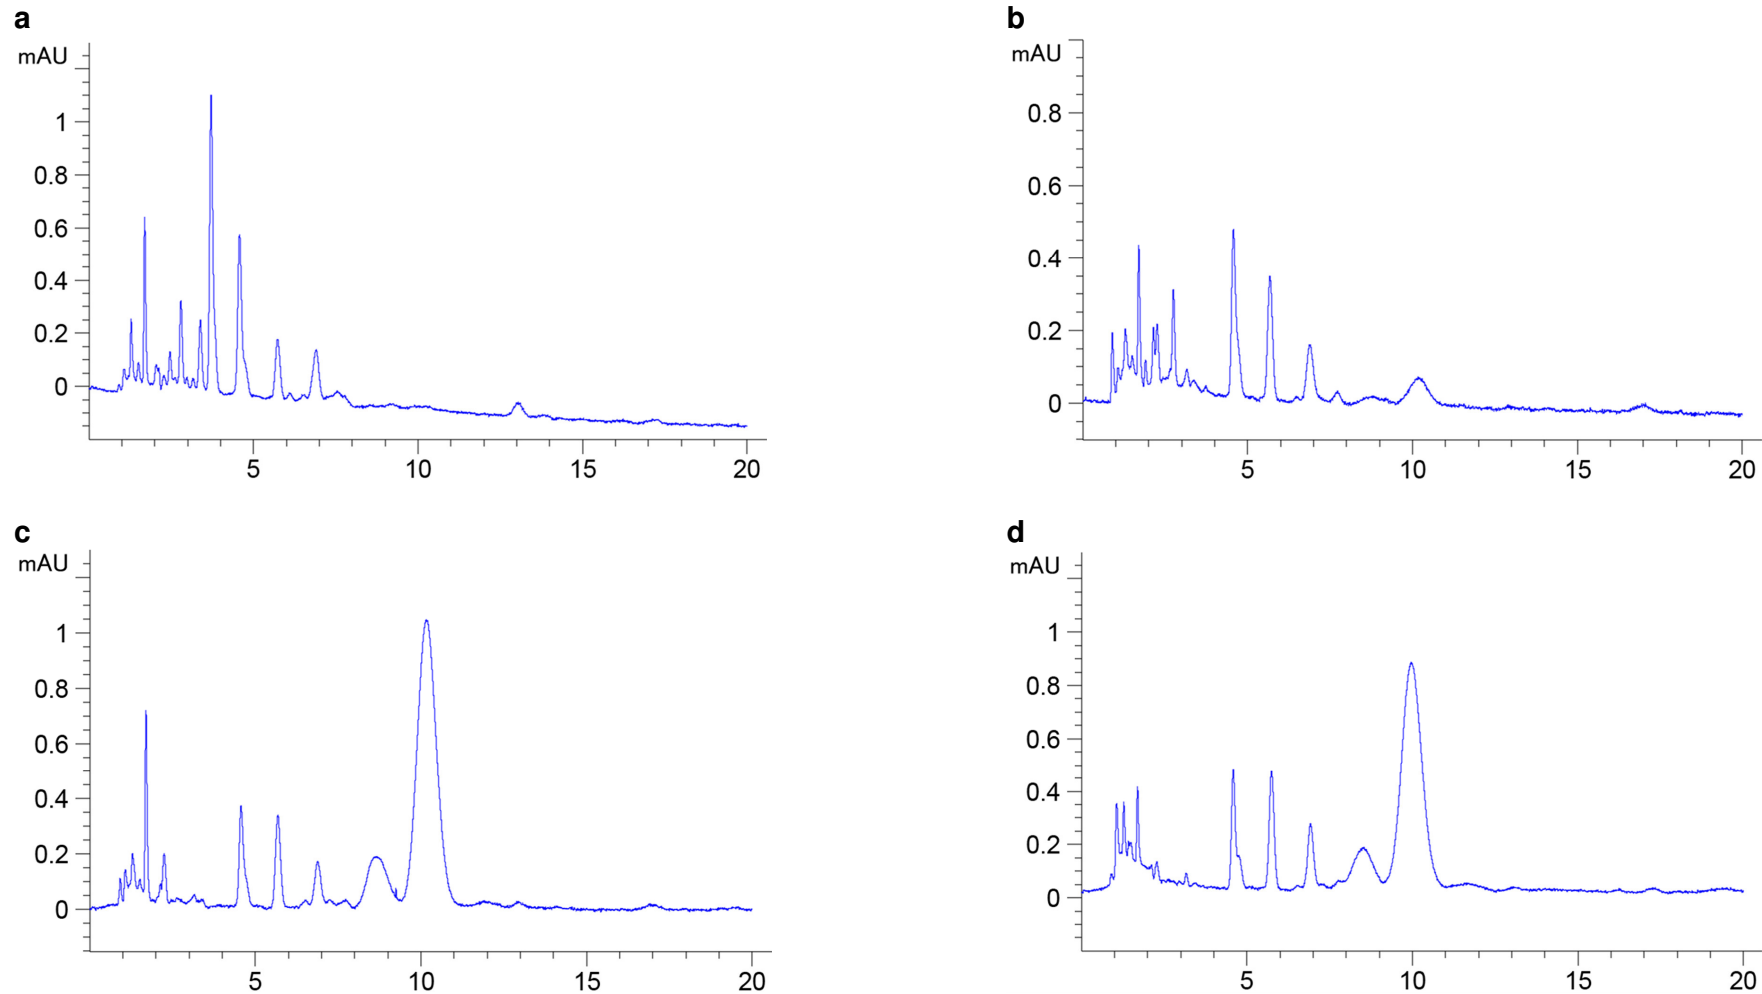

Supplement: Supplementary file 1 [file 15516530]
